# Supplementary material for: Advanced biological ageing predicts future risk for neurological diagnoses and clinical examination findings
Source: PubMed Central journal article supplement (PMC10690013; doi:10.1093/brain/awad252), 2023-07-25
Supplement: awad252_supplementary_data.pdf [file awad252_supplementary_data.pdf]

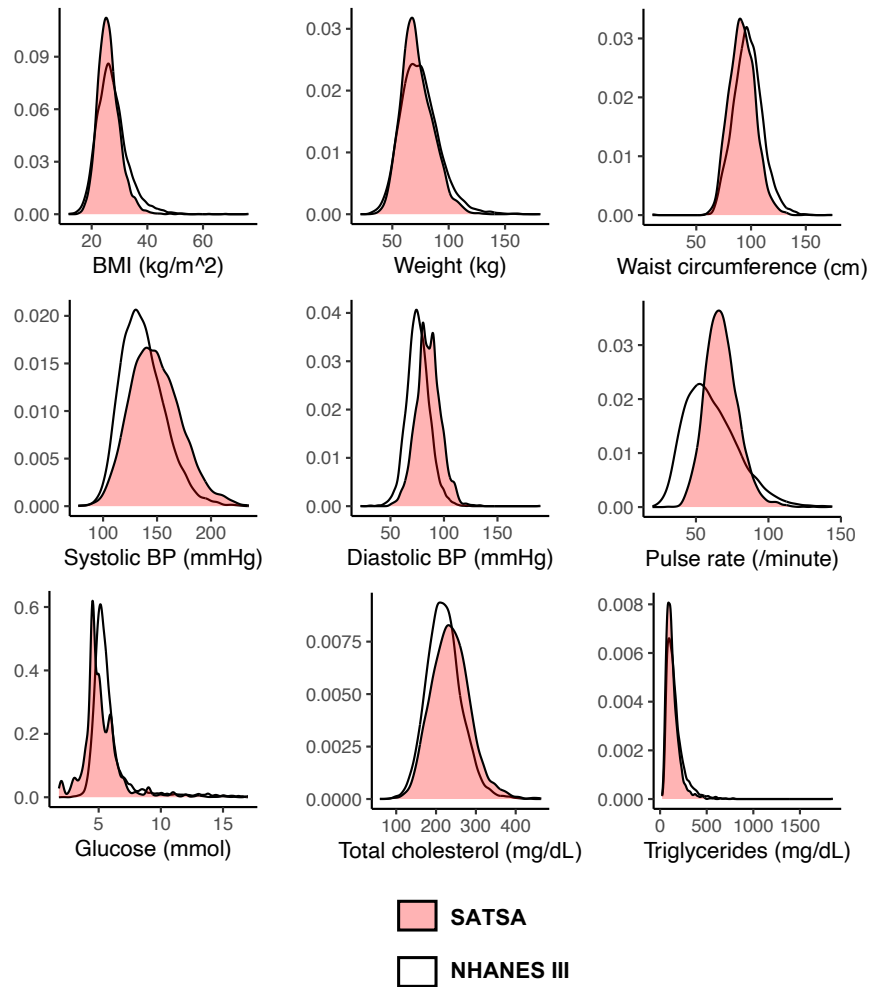

**Supplementary Figure 1: Density plots of individual biomarkers in SATSA (pink) compared to NHANES III (white).** Data from NHANES III are shown for individuals with a chronological age >45 for better comparison with the population of SATSA, which has a minimum chronological age of 44.9. BMI = body mass index, BP = blood pressure, SATSA = Swedish Adoption/Twin Study of Aging, NHANES = National Health and Nutrition Examination Survey.

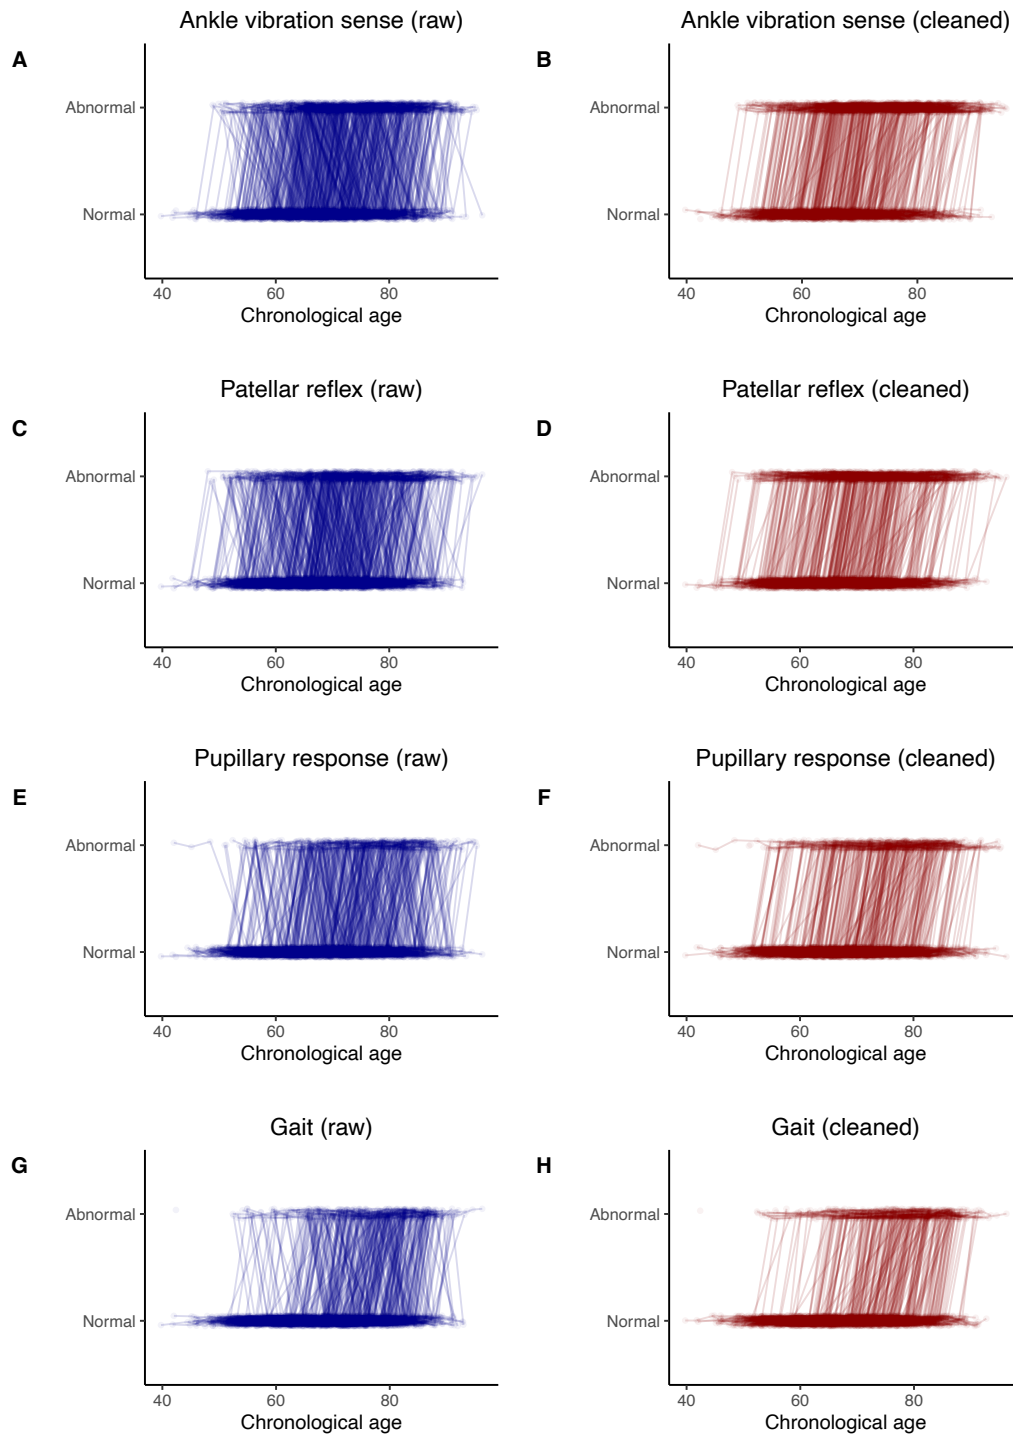

**Supplementary Figure 2: Visualisation of the change in age-associated neurological signs with chronological age.** The raw data (A, C, E, G) and cleaned data, in which abnormal assessments followed by two or more normal assessments are discounted (B, D, F, H), are both shown. Each point represents an individual assessment, with longitudinal assessments from the same individual joined by a line. A vertical jitter is applied to better visualise the individual trajectories.

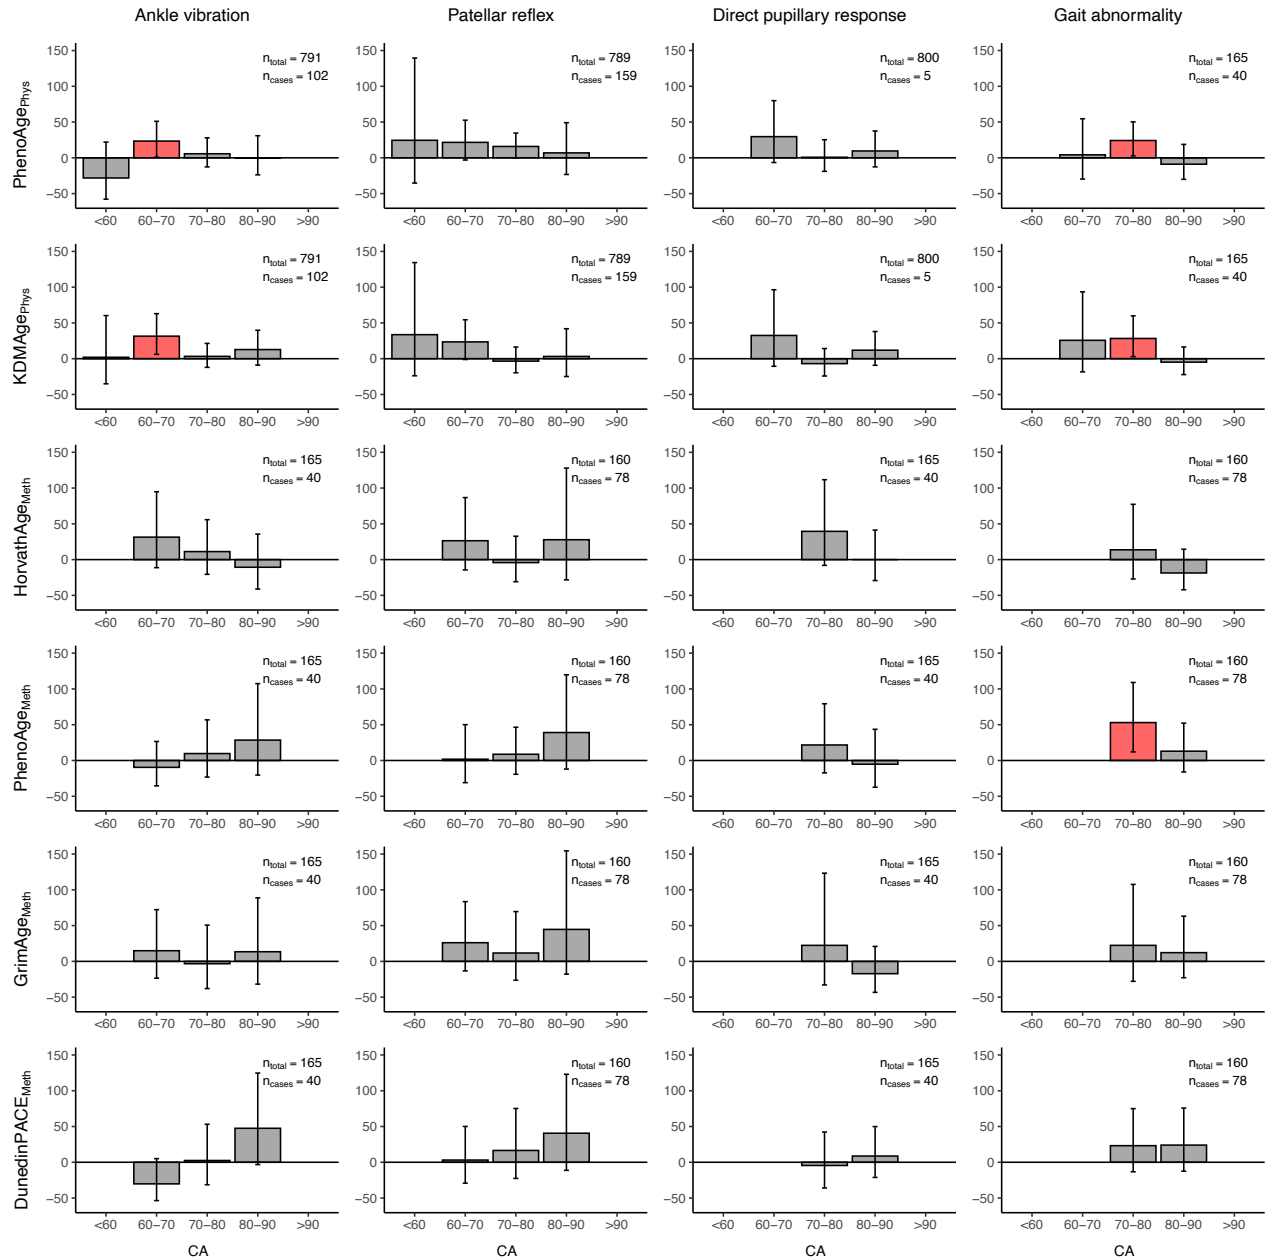

**Supplementary Figure 3: Effect of BA residual on risk of developing abnormal neurological signs at different chronological ages.** The percentage increases in hazard associated with a 1 standard deviation increase in each BA residual are shown, split by chronological age group for loss of vibration sense at the ankle, development of an abnormal patellar tendon reflex, loss of a normal direct pupillary reflex response to light and development of a gait abnormality. The numbers of individuals in each analysis are reported on the plots. Bars are coloured red for a positive effect and grey for no significant effect on hazard. BA = biological age, CA = chronological age,  $n_{total}$  = total population at risk,  $n_{cases}$  = number of cases during follow-up.

**Supplementary Table 1: Hazard ratios for neurological diagnoses of a 1 standard deviation increase in baseline BA residual for all individuals with a complete set of BA assessments.** The total number of individuals at risk ( $n_{total}$ ) and cases ( $n_{cases}$ ) contributing to each analysis are shown. Results are displayed as hazard ratio (95% confidence interval) and statistically significant results ( $p < 0.05$ ) are shown in bold.

|                             | Ischaemic stroke         | Dementia                 | Parkinson's disease      |
|-----------------------------|--------------------------|--------------------------|--------------------------|
| $n_{total}$                 | 358                      | 355                      | 365                      |
| $n_{cases}$                 | 52                       | 83                       | 4                        |
| PhenoAge <sub>Phys</sub>    | 1.28 (0.94, 1.74)        | 0.91 (0.68, 1.22)        | 1.87 (0.93, 3.75)        |
| KDMAge <sub>Phys</sub>      | 1.24 (0.92, 1.66)        | 0.86 (0.67, 1.09)        | <b>2.12 (1.48, 3.04)</b> |
| HorvathAge <sub>Meth</sub>  | 1.16 (0.87, 1.56)        | <b>1.30 (1.07, 1.57)</b> | 0.97 (0.37, 2.56)        |
| PhenoAge <sub>Meth</sub>    | 1.15 (0.80, 1.65)        | 1.18 (0.92, 1.51)        | 1.19 (0.69, 2.04)        |
| GrimAge <sub>Meth</sub>     | 1.41 (0.93, 2.12)        | <b>1.36 (1.01, 1.85)</b> | 1.07 (0.24, 4.80)        |
| DunedinPACE <sub>Meth</sub> | <b>1.30 (1.00, 1.70)</b> | 1.16 (0.93, 1.46)        | 1.99 (0.82, 4.87)        |

**Supplementary Table 2: Hazard ratios for neurological diagnoses of a 1 standard deviation increase in baseline BA residual for all individuals with physiological BA assessments.**

|                          | Ischaemic stroke         | Dementia          | Parkinson's disease |
|--------------------------|--------------------------|-------------------|---------------------|
| $n_{total}$              | 793                      | 791               | 800                 |
| $n_{cases}$              | 109                      | 168               | 13                  |
| PhenoAge <sub>Phys</sub> | <b>1.29 (1.06, 1.58)</b> | 1.09 (0.91, 1.32) | 1.01 (0.58, 1.74)   |
| KDMAge <sub>Phys</sub>   | <b>1.43 (1.18, 1.73)</b> | 0.98 (0.83, 1.15) | 1.03 (0.59, 1.78)   |

**Supplementary Table 3: Hazard ratios for neurological diagnoses of a 1 standard deviation increase in latest premorbid BA residual for all individuals with a complete set of BA assessments.**

|                             | Ischaemic stroke         | Dementia                 | Parkinson's disease       |
|-----------------------------|--------------------------|--------------------------|---------------------------|
| <i>n</i> <sub>total</sub>   | 331                      | 346                      | 294                       |
| <i>n</i> <sub>cases</sub>   | 52                       | 83                       | 4                         |
| PhenoAge <sub>Phys</sub>    | <b>1.33 (1.07, 1.66)</b> | 0.89 (0.67, 1.17)        | 1.59 (0.95, 2.65)         |
| KDMAge <sub>Phys</sub>      | 1.26 (0.97, 1.64)        | 0.92 (0.73, 1.17)        | 1.34 (0.88, 2.04)         |
| HorvathAge <sub>Meth</sub>  | <b>1.48 (1.01, 2.15)</b> | <b>1.27 (1.03, 1.57)</b> | 1.24 (0.41, 3.73)         |
| PhenoAge <sub>Meth</sub>    | 1.27 (0.90, 1.79)        | <b>1.28 (1.00, 1.64)</b> | 1.53 (0.40, 5.85)         |
| GrimAge <sub>Meth</sub>     | 1.39 (0.95, 2.02)        | 1.29 (0.95, 1.74)        | 2.89 (0.74, 11.28)        |
| DunedinPACE <sub>Meth</sub> | <b>1.34 (1.01, 1.78)</b> | 1.15 (0.87, 1.53)        | <b>3.44 (1.07, 11.05)</b> |

**Supplementary Table 4: Hazard ratios for neurological diagnoses of a 1 standard deviation increase in latest premorbid BA residual for all individuals with physiological BA assessments.**

|                           | Ischaemic stroke         | Dementia          | Parkinson's disease |
|---------------------------|--------------------------|-------------------|---------------------|
| <i>n</i> <sub>total</sub> | 756                      | 777               | 736                 |
| <i>n</i> <sub>cases</sub> | 109                      | 168               | 13                  |
| PhenoAge <sub>Phys</sub>  | <b>1.32 (1.10, 1.57)</b> | 0.98 (0.82, 1.18) | 0.84 (0.49, 1.44)   |
| KDMAge <sub>Phys</sub>    | <b>1.27 (1.05, 1.53)</b> | 0.97 (0.82, 1.15) | 0.71 (0.44, 1.16)   |

**Supplementary Table 5: Hazard ratios for neurological diagnoses of a 1 standard deviation increase in the rate of change of BA between baseline and latest premorbid assessments, for individuals with multiple premorbid complete sets of BA assessments.**

The number of individuals with Parkinson's disease and multiple premorbid complete BA assessments were too few for the model to generate estimates.

|                             | Ischaemic stroke  | Dementia          |
|-----------------------------|-------------------|-------------------|
| <i>n</i> <sub>total</sub>   | 211               | 233               |
| <i>n</i> <sub>cases</sub>   | 29                | 48                |
| PhenoAge <sub>Phys</sub>    | 0.81 (0.57, 1.14) | 1.08 (0.67, 1.76) |
| KDMAge <sub>Phys</sub>      | 0.81 (0.54, 1.21) | 1.07 (0.71, 1.63) |
| HorvathAge <sub>Meth</sub>  | 0.89 (0.61, 1.31) | 0.96 (0.60, 1.53) |
| PhenoAge <sub>Meth</sub>    | 0.84 (0.61, 1.17) | 1.09 (0.76, 1.57) |
| GrimAge <sub>Meth</sub>     | 0.79 (0.57, 1.09) | 0.93 (0.62, 1.39) |
| DunedinPACE <sub>Meth</sub> | 0.84 (0.59, 1.21) | 1.00 (0.70, 1.44) |

**Supplementary Table 6: Hazard ratios for neurological diagnoses of a 1 standard deviation increase in the rate of change of BA between baseline and latest premorbid assessments, for individuals with multiple premorbid sets of physiological BA assessments.**

|                           | Ischaemic stroke  | Dementia          | Parkinson's disease |
|---------------------------|-------------------|-------------------|---------------------|
| <i>n</i> <sub>total</sub> | 621               | 651               | 590                 |
| <i>n</i> <sub>cases</sub> | 90                | 133               | 11                  |
| PhenoAge <sub>Phys</sub>  | 0.96 (0.81, 1.14) | 1.05 (0.88, 1.26) | 1.18 (0.68, 2.05)   |
| KDMAge <sub>Phys</sub>    | 0.90 (0.73, 1.11) | 1.06 (0.87, 1.29) | 1.10 (0.75, 1.62)   |

**Supplementary Table 7: Hazard ratios for neurological diagnoses of a 1 standard deviation increase in baseline BA residual for individuals with a complete set of BAs assessments, stratified by twin pairs.** The total number of individuals at risk ( $n_{total}$ ) and cases ( $n_{cases}$ ) contributing to each analysis are shown. Results are displayed as hazard ratio (95% confidence interval) and statistically significant results ( $p < 0.05$ ) are shown in bold. The number of twin pairs with Parkinson's disease were too few for the model to generate estimates.

|                             | Ischaemic stroke  | Dementia           |
|-----------------------------|-------------------|--------------------|
| $n_{total}$                 | 66                | 88                 |
| $n_{cases}$                 | 37                | 56                 |
| PhenoAge <sub>Phys</sub>    | 2.50 (0.77, 8.12) | 0.90 (0.39, 2.09)  |
| KDMAge <sub>Phys</sub>      | 1.42 (0.65, 3.08) | 1.49 (0.68, 3.30)  |
| HorvathAge <sub>Meth</sub>  | 1.47 (0.65, 3.33) | 1.50 (0.69, 3.26)  |
| PhenoAge <sub>Meth</sub>    | 1.67 (0.74, 3.77) | 1.11 (0.57, 2.17)  |
| GrimAge <sub>Meth</sub>     | 1.60 (0.45, 5.66) | 3.12 (0.94, 10.39) |
| DunedinPACE <sub>Meth</sub> | 1.39 (0.50, 3.84) | 0.63 (0.30, 1.33)  |

**Supplementary Table 8: Hazard ratios for neurological diagnoses of a 1 standard deviation increase in baseline BA residual for individuals with baseline physiological BA assessments, stratified by twin pairs.**

|                          | Ischaemic stroke         | Dementia          |
|--------------------------|--------------------------|-------------------|
| $n_{total}$              | 178                      | 250               |
| $n_{cases}$              | 102                      | 153               |
| PhenoAge <sub>Phys</sub> | 1.59 (0.93, 2.71)        | 1.05 (0.70, 1.57) |
| KDMAge <sub>Phys</sub>   | <b>1.97 (1.18, 3.27)</b> | 1.09 (0.72, 1.66) |

**Supplementary Table 9: Lifetime prevalence of abnormal neurological signs on clinical examination amongst SATSA participants.**

|                                   | <i>n</i> <sub>cases</sub> (%) |
|-----------------------------------|-------------------------------|
| Impaired ankle vibration sense    | 498 (62.1%)                   |
| Abnormal patellar reflex          | 393 (49.0%)                   |
| Impaired pupillary light response | 269 (33.5%)                   |
| Abnormal gait                     | 277 (34.5%)                   |



**Supplementary Table 10: Hazard ratios for abnormal clinical signs of a 1 standard deviation increase in baseline BA residual for all individuals with a complete set of BA assessments.** The total number of individuals at risk ( $n_{total}$ ) and cases with abnormal signs ( $n_{cases}$ ) contributing to each analysis are shown. Results are displayed as hazard ratio (95% confidence interval) and statistically significant results ( $p < 0.05$ ) are shown in bold.

|                             | Ankle vibration   | Patellar reflex   | Pupil light reflex | Gait                     |
|-----------------------------|-------------------|-------------------|--------------------|--------------------------|
| $n_{total}$                 | 222               | 234               | 273                | 269                      |
| $n_{cases}$                 | 119               | 99                | 94                 | 102                      |
| PhenoAge <sub>Phys</sub>    | 1.22 (0.95, 1.57) | 1.18 (0.88, 1.57) | 1.11 (0.94, 1.32)  | <b>1.25 (1.03, 1.53)</b> |
| KDMAge <sub>Phys</sub>      | 1.09 (0.88, 1.35) | 1.05 (0.83, 1.34) | 1.13 (0.98, 1.31)  | 1.14 (0.91, 1.44)        |
| HorvathAge <sub>Meth</sub>  | 0.97 (0.76, 1.23) | 0.95 (0.76, 1.18) | 1.04 (0.80, 1.35)  | 0.99 (0.78, 1.25)        |
| PhenoAge <sub>Meth</sub>    | 0.98 (0.78, 1.23) | 1.13 (0.87, 1.46) | 1.02 (0.79, 1.32)  | 1.26 (0.99, 1.61)        |
| GrimAge <sub>Meth</sub>     | 0.88 (0.62, 1.25) | 1.09 (0.74, 1.60) | 1.13 (0.82, 1.54)  | 1.09 (0.72, 1.63)        |
| DunedinPACE <sub>Meth</sub> | 0.85 (0.67, 1.09) | 1.08 (0.86, 1.35) | 1.04 (0.81, 1.35)  | <b>1.25 (1.02, 1.53)</b> |

**Supplementary Table 11: Hazard ratios for abnormal clinical signs of a 1 standard deviation increase in baseline BA residual for all individuals with physiological BA assessments.**

|                          | Ankle vibration   | Patellar reflex          | Pupil light reflex       | Gait                     |
|--------------------------|-------------------|--------------------------|--------------------------|--------------------------|
| $n_{total}$              | 577               | 628                      | 673                      | 658                      |
| $n_{cases}$              | 330               | 289                      | 221                      | 208                      |
| PhenoAge <sub>Phys</sub> | 1.08 (0.93, 1.24) | <b>1.19 (1.03, 1.37)</b> | <b>1.26 (1.07, 1.48)</b> | <b>1.37 (1.17, 1.59)</b> |
| KDMAge <sub>Phys</sub>   | 1.12 (0.98, 1.28) | 0.98 (0.86, 1.12)        | <b>1.21 (1.05, 1.40)</b> | <b>1.18 (1.00, 1.40)</b> |

**Supplementary Table 12: Hazard ratios for abnormal clinical signs of a 1 standard deviation increase in latest premorbid BA residual for all individuals with a complete set of BA assessments.**

|                             | Ankle vibration   | Patellar reflex   | Pupil light reflex       | Gait                     |
|-----------------------------|-------------------|-------------------|--------------------------|--------------------------|
| <i>n</i> <sub>total</sub>   | 160               | 153               | 166                      | 164                      |
| <i>n</i> <sub>cases</sub>   | 119               | 99                | 94                       | 102                      |
| PhenoAge <sub>Phys</sub>    | 1.08 (0.83, 1.41) | 1.08 (0.81, 1.45) | 1.15 (0.91, 1.45)        | <b>1.22 (1.02, 1.45)</b> |
| KDMAge <sub>Phys</sub>      | 0.86 (0.67, 1.11) | 0.98 (0.78, 1.25) | 0.99 (0.83, 1.17)        | 1.13 (0.91, 1.39)        |
| HorvathAge <sub>Meth</sub>  | 1.15 (0.96, 1.37) | 1.00 (0.82, 1.21) | <b>1.29 (1.06, 1.58)</b> | 1.15 (0.91, 1.44)        |
| PhenoAge <sub>Meth</sub>    | 1.03 (0.86, 1.22) | 1.04 (0.87, 1.26) | 1.03 (0.81, 1.32)        | <b>1.24 (1.03, 1.49)</b> |
| GrimAge <sub>Meth</sub>     | 0.94 (0.75, 1.18) | 1.15 (0.90, 1.48) | 1.28 (0.93, 1.76)        | <b>1.31 (1.01, 1.70)</b> |
| DunedinPACE <sub>Meth</sub> | 1.00 (0.79, 1.26) | 1.14 (0.91, 1.43) | 0.98 (0.78, 1.24)        | 1.10 (0.88, 1.39)        |

**Supplementary Table 13: Hazard ratios for abnormal clinical signs of a 1 standard deviation increase in latest premorbid BA residual for all individuals with premorbid physiological BA assessments.**

|                           | Ankle vibration          | Patellar reflex          | Pupil light reflex | Gait              |
|---------------------------|--------------------------|--------------------------|--------------------|-------------------|
| <i>n</i> <sub>total</sub> | 440                      | 457                      | 395                | 343               |
| <i>n</i> <sub>cases</sub> | 330                      | 289                      | 221                | 208               |
| PhenoAge <sub>Phys</sub>  | <b>1.15 (1.00, 1.32)</b> | <b>1.17 (1.06, 1.29)</b> | 1.12 (0.97, 1.29)  | 1.11 (0.92, 1.34) |
| KDMAge <sub>Phys</sub>    | 1.01 (0.89, 1.14)        | 0.98 (0.87, 1.10)        | 1.02 (0.89, 1.17)  | 1.01 (0.88, 1.17) |

**Supplementary Table 14: Hazard ratios for abnormal clinical signs of a 1 standard deviation increase in the rate of change of BA between baseline and latest premorbid assessments, for individuals with multiple premorbid complete sets of BA assessments.**

|                             | Ankle vibration   | Patellar reflex   | Pupil light reflex | Gait              |
|-----------------------------|-------------------|-------------------|--------------------|-------------------|
| <i>n</i> <sub>total</sub>   | 89                | 80                | 72                 | 81                |
| <i>n</i> <sub>cases</sub>   | 74                | 58                | 45                 | 52                |
| PhenoAge <sub>Phys</sub>    | 1.13 (0.87, 1.48) | 1.10 (0.73, 1.66) | 0.84 (0.62, 1.14)  | 0.80 (0.61, 1.05) |
| KDMAge <sub>Phys</sub>      | 0.96 (0.76, 1.21) | 1.04 (0.70, 1.54) | 0.86 (0.64, 1.16)  | 0.96 (0.71, 1.28) |
| HorvathAge <sub>Meth</sub>  | 0.94 (0.77, 1.16) | 0.89 (0.68, 1.16) | 1.16 (0.87, 1.55)  | 0.97 (0.77, 1.24) |
| PhenoAge <sub>Meth</sub>    | 1.12 (0.88, 1.43) | 1.07 (0.77, 1.50) | 0.86 (0.63, 1.18)  | 0.87 (0.70, 1.09) |
| GrimAge <sub>Meth</sub>     | 0.91 (0.70, 1.17) | 0.86 (0.59, 1.25) | 1.28 (0.85, 1.92)  | 1.25 (0.83, 1.90) |
| DunedinPACE <sub>Meth</sub> | 0.96 (0.73, 1.26) | 0.79 (0.58, 1.06) | 1.10 (0.87, 1.38)  | 0.86 (0.66, 1.11) |

**Supplementary Table 15: Hazard ratios for abnormal clinical signs of a 1 standard deviation increase in the rate of change of BA between baseline and latest premorbid assessments, for individuals with multiple premorbid sets of physiological BA assessments.**

|                           | Ankle vibration   | Patellar reflex   | Pupil light reflex | Gait                     |
|---------------------------|-------------------|-------------------|--------------------|--------------------------|
| <i>n</i> <sub>total</sub> | 303               | 282               | 295                | 280                      |
| <i>n</i> <sub>cases</sub> | 219               | 159               | 168                | 177                      |
| PhenoAge <sub>Phys</sub>  | 1.12 (0.93, 1.36) | 1.11 (0.90, 1.36) | 0.92 (0.73, 1.16)  | <b>0.79 (0.67, 0.92)</b> |
| KDMAge <sub>Phys</sub>    | 0.96 (0.85, 1.09) | 1.15 (0.93, 1.41) | 0.84 (0.68, 1.03)  | 0.90 (0.76, 1.08)        |

**Supplementary Table 16: Hazard ratios for abnormal clinical signs of a 1 standard deviation increase in baseline BA residual for individuals with a complete set of baseline BA assessments, stratified by twin pairs.** The total number of individuals at risk ( $n_{total}$ ) and cases ( $n_{cases}$ ) contributing to each analysis are shown. Results are displayed as hazard ratio (95% confidence interval) and statistically significant results ( $p < 0.05$ ) are shown in bold.

|                             | Ankle vibration   | Patellar reflex   | Pupil light reflex | Gait              |
|-----------------------------|-------------------|-------------------|--------------------|-------------------|
| $n_{total}$                 | 130               | 98                | 102                | 110               |
| $n_{cases}$                 | 87                | 63                | 63                 | 76                |
| PhenoAge <sub>Phys</sub>    | 0.99 (0.49, 2.00) | 0.90 (0.36, 2.20) | 1.56 (0.64, 3.76)  | 1.09 (0.44, 2.70) |
| KDMAge <sub>Phys</sub>      | 1.34 (0.57, 3.15) | 0.97 (0.31, 3.02) | 1.35 (0.52, 3.51)  | 0.84 (0.34, 2.05) |
| HorvathAge <sub>Meth</sub>  | 1.36 (0.68, 2.72) | 1.25 (0.41, 3.76) | 1.69 (0.63, 4.54)  | 1.02 (0.29, 3.61) |
| PhenoAge <sub>Meth</sub>    | 1.03 (0.56, 1.89) | 1.45 (0.38, 5.56) | 0.79 (0.33, 1.91)  | 0.76 (0.20, 2.85) |
| GrimAge <sub>Meth</sub>     | 0.65 (0.28, 1.51) | 0.93 (0.27, 3.15) | 1.43 (0.56, 3.62)  | 0.44 (0.08, 2.44) |
| DunedinPACE <sub>Meth</sub> | 0.80 (0.46, 1.36) | 0.71 (0.18, 2.81) | 0.92 (0.53, 1.61)  | 0.94 (0.41, 2.14) |

**Supplementary Table 17: Hazard ratios for abnormal clinical signs of a 1 standard deviation increase in baseline BA residual for individuals with baseline physiological BA assessments, stratified by twin pairs.**

|                          | Ankle vibration   | Patellar reflex   | Pupil light reflex | Gait              |
|--------------------------|-------------------|-------------------|--------------------|-------------------|
| $n_{total}$              | 358               | 342               | 290                | 274               |
| $n_{cases}$              | 249               | 229               | 180                | 173               |
| PhenoAge <sub>Phys</sub> | 0.98 (0.66, 1.46) | 1.05 (0.77, 1.45) | 1.35 (0.86, 2.10)  | 0.94 (0.63, 1.42) |
| KDMAge <sub>Phys</sub>   | 1.10 (0.76, 1.60) | 1.10 (0.78, 1.56) | 1.03 (0.70, 1.50)  | 0.84 (0.54, 1.31) |
